# Supplementary material for: Does Reduced IGF-1R Signaling in Igf1r +/− Mice Alter Aging?
Source: PubMed Central journal article supplement (PMC3223158; doi:10.1371/journal.pone.0026891), 2011-11-23
Supplement: pone.0026891.s002.pdf [file pone.0026891.s002.pdf]

**Table S1. Circulating Levels of IGF-1**

**6 Months Old**

|                                          | <b>Mean</b> | <b>SEM</b> | <b>P</b> |
|------------------------------------------|-------------|------------|----------|
| <b>Male WT</b>                           | 230         | 24         |          |
| <b>Male <i>Igflr<sup>+/+</sup></i></b>   | 236         | 7          | 0.82     |
| <b>Female WT</b>                         | 183         | 15         |          |
| <b>Female <i>Igflr<sup>+/+</sup></i></b> | 246         | 29         | 0.12     |

**25 Months Old**

|                                          | <b>Mean</b> | <b>SEM</b> | <b>P</b> |
|------------------------------------------|-------------|------------|----------|
| <b>Male WT</b>                           | 252         | 15         |          |
| <b>Male <i>Igflr<sup>+/+</sup></i></b>   | 263         | 11         | 0.56     |
| <b>Female WT</b>                         | 232         | 11         |          |
| <b>Female <i>Igflr<sup>+/+</sup></i></b> | 247         | 10         | 0.33     |
