# Supplementary material for: Does Reduced IGF-1R Signaling in Igf1r +/− Mice Alter Aging?
Source: PubMed Central journal article supplement (PMC3223158; doi:10.1371/journal.pone.0026891), 2011-11-23
Supplement: pone.0026891.s003.pdf [file pone.0026891.s003.pdf]

**Table S2. Igf1r Expression**

| Sex    | Age       | Tissue | WT |      |      | Igf1r+/- |      |      |
|--------|-----------|--------|----|------|------|----------|------|------|
|        |           |        | N  | Mean | SEM  | N        | Mean | SEM  |
| Male   | 6 Months  | Kidney | 3  | 1.04 | 0.06 | 3        | 0.66 | 0.08 |
|        |           | Lung   | 4  | 1.35 | 0.26 | 4        | 0.89 | 0.10 |
|        |           | Muscle | 4  | 0.87 | 0.16 | 4        | 1.02 | 0.15 |
|        | 25 Months | Kidney | 4  | 0.94 | 0.17 | 4        | 1.10 | 0.25 |
|        |           | Lung   | 6  | 0.78 | 0.10 | 6        | 0.89 | 0.05 |
|        |           | Muscle | 5  | 0.69 | 0.09 | 4        | 0.44 | 0.10 |
| Female | 6 Months  | Kidney | 3  | 0.91 | 0.11 | 3        | 0.87 | 0.20 |
|        |           | Lung   | 4  | 0.94 | 0.18 | 4        | 1.07 | 0.16 |
|        |           | Muscle | 4  | 0.53 | 0.06 | 4        | 0.91 | 0.27 |
|        | 25 Months | Kidney | 3  | 0.87 | 0.05 | 3        | 0.82 | 0.04 |
|        |           | Lung   | 6  | 0.84 | 0.05 | 5        | 0.72 | 0.06 |
|        |           | Muscle | 3  | 0.45 | 0.09 | 3        | 0.26 | 0.03 |
