# Supplementary material for: Does Reduced IGF-1R Signaling in Igf1r +/− Mice Alter Aging?
Source: PubMed Central journal article supplement (PMC3223158; doi:10.1371/journal.pone.0026891), 2011-11-23
Supplement: pone.0026891.s004.pdf [file pone.0026891.s004.pdf]

**Table S3. Incidence of Lesions in Males**

|                                               | WT |              | Igf1r <sup>+/-</sup> |              |              | Raw P | Adjusted P |
|-----------------------------------------------|----|--------------|----------------------|--------------|--------------|-------|------------|
|                                               | N  | Positive # % | N                    | Positive # % | Positive # % |       |            |
| <b>Neoplastic Lesions</b>                     |    |              |                      |              |              |       |            |
| Total                                         | 49 | 40 81.6      | 59                   | 46 78.0      | 0.84         | 1.00  |            |
| Fatal                                         | 49 | 28 57.1      | 59                   | 21 35.6      | 0.03         | 0.61  |            |
| <b>Lymphoma</b>                               |    |              |                      |              |              |       |            |
| Total                                         | 49 | 37 75.5      | 59                   | 38 64.4      | 0.77         | 1.00  |            |
| Fatal                                         | 49 | 25 51.0      | 59                   | 16 27.1      | 0.02         | 0.41  |            |
| <b>Adenoma, Lung</b>                          |    |              |                      |              |              |       |            |
| Total                                         | 48 | 4 8.3        | 57                   | 7 12.3       | -            | -     |            |
| Fatal                                         | 48 | 2 4.2        | 57                   | 4 7.0        | -            | -     |            |
| <b>Adenoma, Thyroid</b>                       |    |              |                      |              |              |       |            |
| Total                                         | 38 | 1 2.6        | 41                   | 2 4.9        | -            | -     |            |
| Fatal                                         | 38 | 1 2.6        | 41                   | 1 2.4        | -            | -     |            |
| <b>Non-Neoplastic Lesions</b>                 |    |              |                      |              |              |       |            |
| Total                                         | 49 | 46 93.9      | 59                   | 53 89.8      | 0.57         | 1.00  |            |
| Fatal                                         | 49 | 3 6.1        | 59                   | 2 3.4        | -            | -     |            |
| <b>Glomerulonephritis</b>                     |    |              |                      |              |              |       |            |
| Total                                         | 49 | 24 49.0      | 59                   | 37 62.7      | 0.11         | 1.00  |            |
| Fatal                                         | 49 | 2 4.1        | 59                   | 1 1.7        | -            | -     |            |
| <b>Degeneration, Gonad</b>                    | 48 | 22 45.8      | 59                   | 29 49.2      | 0.45         | 1.00  |            |
| <b>Lymphocytic Infiltrate</b>                 | 49 | 26 53.1      | 59                   | 25 42.4      | 0.20         | 1.00  |            |
| <b>Kidney</b>                                 | 49 | 14 28.6      | 59                   | 14 23.7      | 0.58         | 1.00  |            |
| <b>Lung</b>                                   | 48 | 8 16.7       | 57                   | 10 17.5      | 0.91         | 1.00  |            |
| <b>Salivary Gland</b>                         | 45 | 5 11.1       | 56                   | 4 7.1        | -            | -     |            |
| <b>Liver</b>                                  | 49 | 2 4.1        | 59                   | 5 8.5        | -            | -     |            |
| <b>Intestine</b>                              | 49 | 3 6.1        | 58                   | 1 1.7        | -            | -     |            |
| <b>Other Reproductive Organs</b>              | 49 | 2 4.1        | 59                   | 1 1.7        | -            | -     |            |
| <b>Subcapsular Hyperplasia, Adrenal Gland</b> | 47 | 12 25.5      | 59                   | 17 28.8      | 0.45         | 1.00  |            |
| <b>Nephrocalcinosis</b>                       | 49 | 8 16.3       | 59                   | 10 16.9      | 0.48         | 1.00  |            |
| <b>Suppurative Inflammation</b>               | 49 | 7 14.3       | 59                   | 7 11.9       | -            | -     |            |
| <b>Psammoma Bodies, Brain</b>                 | 49 | 8 16.3       | 59                   | 3 5.1        | -            | -     |            |
| <b>Sperm Cell Granulosa</b>                   | 49 | 3 6.1        | 59                   | 2 3.4        | -            | -     |            |
| <b>Other Reproductive Organs</b>              | 49 | 2 4.1        | 59                   | 1 1.7        | -            | -     |            |
| <b>Congestion &amp; Edema, Lung</b>           | 48 | 1 2.1        | 57                   | 4 7.0        | -            | -     |            |
| <b>Ulcer, Stomach</b>                         | 49 | 2 4.1        | 58                   | 1 1.7        | -            | -     |            |
| <b>Fatty Change, Liver</b>                    | 49 | 0 0.0        | 59                   | 3 5.1        | -            | -     |            |
| <b>Angiectasia, Liver</b>                     | 49 | 2 4.1        | 59                   | 0 0.0        | -            | -     |            |
| <b>Cortical Hyperplasia, Adrenal Gland</b>    | 47 | 2 4.3        | 59                   | 0 0.0        | -            | -     |            |
| <b>Exocrine Atrophy, Pancreas</b>             | 46 | 2 4.3        | 55                   | 0 0.0        | -            | -     |            |
| <b>Lymphoid Hyperplasia, Lymph Nodes</b>      | 47 | 0 0.0        | 58                   | 2 3.4        | -            | -     |            |
