# Supplementary material for: Does Reduced IGF-1R Signaling in Igf1r +/− Mice Alter Aging?
Source: PubMed Central journal article supplement (PMC3223158; doi:10.1371/journal.pone.0026891), 2011-11-23
Supplement: pone.0026891.s005.pdf [file pone.0026891.s005.pdf]

**Table S4. Incidence of Lesions in Females**

|                                               | WT |              | Igf1r <sup>+/-</sup> |              |              | Raw P | Adjusted P |
|-----------------------------------------------|----|--------------|----------------------|--------------|--------------|-------|------------|
|                                               | N  | Positive # % | N                    | Positive # % | Positive # % |       |            |
| <b>Neoplastic Lesions</b>                     |    |              |                      |              |              |       |            |
| Total                                         | 57 | 48 84.2      | 46                   | 42 91.3      | 0.59         | 1.00  |            |
| Fatal                                         | 57 | 34 59.6      | 46                   | 24 52.2      | 0.78         | 1.00  |            |
| <b>Lymphoma</b>                               |    |              |                      |              |              |       |            |
| Total                                         | 57 | 43 75.4      | 46                   | 41 89.1      | 0.15         | 1.00  |            |
| Fatal                                         | 57 | 25 43.9      | 46                   | 21 45.7      | 0.38         | 1.00  |            |
| <b>Adenoma, Pituitary</b>                     |    |              |                      |              |              |       |            |
| Total                                         | 48 | 9 18.8       | 40                   | 3 7.5        | 0.13         | 1.00  |            |
| Fatal                                         | 48 | 6 12.5       | 40                   | 3 7.5        | -            | -     |            |
| <b>Adenoma, Thyroid</b>                       |    |              |                      |              |              |       |            |
| Total                                         | 37 | 5 13.5       | 38                   | 3 7.9        | -            | -     |            |
| Fatal                                         | 37 | 3 8.1        | 38                   | 1 2.6        | -            | -     |            |
| <b>Adenoma, Lung</b>                          |    |              |                      |              |              |       |            |
| Total                                         | 57 | 3 5.3        | 46                   | 1 2.2        | -            | -     |            |
| Fatal                                         | 57 | 2 3.5        | 46                   | 0 0.0        | -            | -     |            |
| <b>Hemangiosarcoma</b>                        | 57 | 2 3.5        | 46                   | 0 0.0        | -            | -     |            |
| <b>Non-Neoplastic Lesions</b>                 |    |              |                      |              |              |       |            |
| Total                                         | 57 | 55 96.5      | 46                   | 45 97.8      | 0.61         | 1.00  |            |
| Fatal                                         | 57 | 9 15.8       | 46                   | 6 13.0       | 0.60         | 1.00  |            |
| <b>Glomerulonephritis</b>                     |    |              |                      |              |              |       |            |
| Total                                         | 57 | 45 78.9      | 46                   | 39 84.8      | 0.20         | 1.00  |            |
| Fatal                                         | 57 | 7 12.3       | 46                   | 6 13.0       | -            | -     |            |
| <b>Subcapsular Hyperplasia, Adrenal Gland</b> | 57 | 39 68.4      | 46                   | 39 84.8      | 0.17         | 1.00  |            |
| <b>Lymphocytic Infiltrate</b>                 | 57 | 32 56.1      | 46                   | 18 39.1      | 0.05         | 1.00  |            |
| <b>Kidney</b>                                 | 57 | 21 36.8      | 46                   | 11 23.9      | 0.09         | 1.00  |            |
| <b>Lung</b>                                   | 57 | 14 24.6      | 46                   | 5 10.9       | 0.04         | 0.97  |            |
| <b>Salivary Gland</b>                         | 54 | 7 13.0       | 45                   | 3 6.7        | -            | -     |            |
| <b>Urinary</b>                                | 57 | 4 7.0        | 45                   | 2 4.4        | -            | -     |            |
| <b>Intestine</b>                              | 57 | 3 5.3        | 46                   | 2 4.3        | -            | -     |            |
| <b>Liver</b>                                  | 57 | 2 3.5        | 46                   | 0 0.0        | -            | -     |            |
| <b>Nephrocalcinosis</b>                       | 57 | 11 19.3      | 46                   | 15 32.6      | 0.51         | 1.00  |            |
| <b>Congestion &amp; Edema, Lung</b>           | 57 | 5 8.8        | 46                   | 2 4.3        | -            | -     |            |
| <b>Endometrial Hyperplasia</b>                | 57 | 4 7.0        | 46                   | 3 6.5        | -            | -     |            |
| <b>Centrolobular Necrosis, Liver</b>          | 57 | 3 5.3        | 46                   | 1 2.2        | -            | -     |            |
| <b>Erosion, Stomach</b>                       | 57 | 1 1.8        | 46                   | 3 6.5        | -            | -     |            |
| <b>Follicular Hyperplasia, Thyroid</b>        | 37 | 2 5.4        | 38                   | 0 0.0        | -            | -     |            |
| <b>Follicular Hyperplasia, Thyroid</b>        | 37 | 2 5.4        | 38                   | 0 0.0        | -            | -     |            |
| <b>Interstitial Hyperplasia, Pancreas</b>     | 52 | 0 0.0        | 44                   | 2 4.5        | -            | -     |            |
