# Supplementary material for: Does Reduced IGF-1R Signaling in Igf1r +/− Mice Alter Aging?
Source: PubMed Central journal article supplement (PMC3223158; doi:10.1371/journal.pone.0026891), 2011-11-23
Supplement: pone.0026891.s006.pdf [file pone.0026891.s006.pdf]

**Table S5. Males and Females, Severity**

| Males                                         | WT |      |      | Igf1r <sup>+/-</sup> |      |      | Raw P | Adjusted P |
|-----------------------------------------------|----|------|------|----------------------|------|------|-------|------------|
|                                               | N  | Mean | SEM  | N                    | Mean | SEM  |       |            |
| <b>Lymphoma</b>                               |    |      |      |                      |      |      |       |            |
| Total                                         | 49 | 2.15 | 0.26 | 59                   | 1.80 | 0.24 | 0.71  | 1.00       |
| Fatal                                         | 49 | 0.63 | 0.10 | 59                   | 0.31 | 0.07 | 0.02  | 0.25       |
| <b>Lymphocytic Infiltrate</b>                 | 49 | 0.75 | 0.12 | 59                   | 0.60 | 0.11 | 0.27  | 1.00       |
| <b>Glomerulonephritis</b>                     | 49 | 0.67 | 0.12 | 59                   | 0.71 | 0.09 | 0.39  | 1.00       |
| <b>Degeneration, Gonad</b>                    | 48 | 0.88 | 0.16 | 59                   | 0.90 | 0.14 | 0.63  | 1.00       |
| <b>Subcapsular Hyperplasia, Adrenal Gland</b> | 47 | 0.40 | 0.11 | 59                   | 0.41 | 0.10 | 0.62  | 1.00       |
| <b>Nephrocalcinosis</b>                       | 49 | 0.31 | 0.11 | 59                   | 0.24 | 0.08 | 0.61  | 1.00       |
|                                               |    |      |      |                      |      |      |       |            |
| Females                                       | WT |      |      | Igf1r <sup>+/-</sup> |      |      | Raw P | Adjusted P |
|                                               | N  | Mean | SEM  | N                    | Mean | SEM  |       |            |
| <b>Lymphoma</b>                               |    |      |      |                      |      |      |       |            |
| Total                                         | 57 | 2.88 | 0.36 | 46                   | 3.46 | 0.32 | 0.36  | 1.00       |
| Fatal                                         | 57 | 0.44 | 0.07 | 46                   | 0.54 | 0.10 | 0.14  | 1.00       |
| <b>Lymphocytic Infiltrate</b>                 | 57 | 0.91 | 0.14 | 46                   | 0.50 | 0.10 | 0.03  | 0.59       |
| <b>Glomerulonephritis</b>                     | 57 | 1.37 | 0.13 | 46                   | 1.46 | 0.14 | 0.59  | 1.00       |
| <b>Subcapsular Hyperplasia, Adrenal Gland</b> | 57 | 1.54 | 0.18 | 46                   | 1.87 | 0.16 | 0.19  | 1.00       |
| <b>Nephrocalcinosis</b>                       | 57 | 0.32 | 0.10 | 46                   | 0.61 | 0.15 | 0.41  | 1.00       |
| <b>Adenoma, Pituitary</b>                     | 48 | 0.56 | 0.18 | 40                   | 0.25 | 0.14 | 0.14  | 1.00       |
