# Supplementary material for: Does Reduced IGF-1R Signaling in Igf1r +/− Mice Alter Aging?
Source: PubMed Central journal article supplement (PMC3223158; doi:10.1371/journal.pone.0026891), 2011-11-23
Supplement: pone.0026891.s007.pdf [file pone.0026891.s007.pdf]

**Table S6. Males and Females, Disease Burden**

|                                          | WT |      |      | Igf1r <sup>+/-</sup> |      |      | Raw P | Adjusted P |
|------------------------------------------|----|------|------|----------------------|------|------|-------|------------|
|                                          | N  | Mean | SEM  | N                    | Mean | SEM  |       |            |
| <b>Male, Total Disease Burden</b>        | 49 | 3.68 | 0.25 | 59                   | 3.55 | 0.22 | 0.86  | 1.00       |
| <b>Male, Neoplastic Disease Burden</b>   | 49 | 0.96 | 0.08 | 59                   | 0.96 | 0.08 | 0.51  | 1.00       |
| <b>Female, Total Disease Burden</b>      | 57 | 4.15 | 0.22 | 46                   | 4.07 | 0.21 | 0.47  | 1.00       |
| <b>Female, Neoplastic Disease Burden</b> | 57 | 1.23 | 0.10 | 46                   | 1.11 | 0.07 | 0.11  | 1.00       |
