# Supplementary material for: Does Reduced IGF-1R Signaling in Igf1r+/− Mice Alter Aging?
Source: PLOS journal article supplement (doi:10.1371/journal.pone.0026891), 2011-11-23
Supplement: S1 (10.1371/journal.pone.0026891.s001) [file journal.pone.0026891.s001]

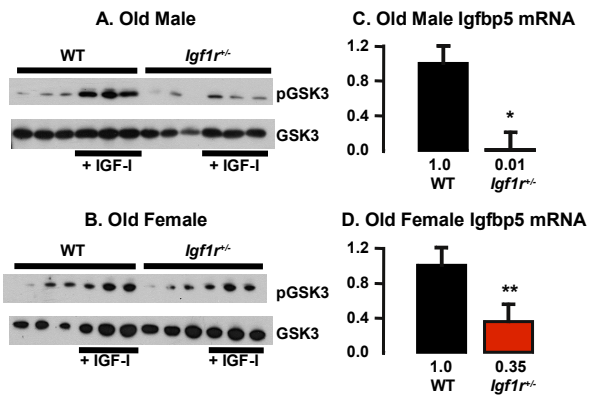

**Figure S1. Induction of GSK3 $\beta$  phosphorylation and levels of Igfbp5 mRNA transcript in WT and *Igf1r<sup>+/-</sup>* mice.** Levels of phosphorylated GSK3 $\beta$  were measured in the muscle (quadriceps) of 25-month-old male (Graph A) and female (Graph B) mice following injection of saline or rhIGF-1 (1 mg/kg body wt.) using Western blots as described in Materials and Methods. Three animals were used per group. The expression of Igfbp5 was measured in the same samples using qRT-PCR (Graphs C and D). The vertical axis represents expression levels relative to B2M and the error bars represent SEM. P-values of 0.01 and 0.005 are represented by \* and \*\*, respectively.

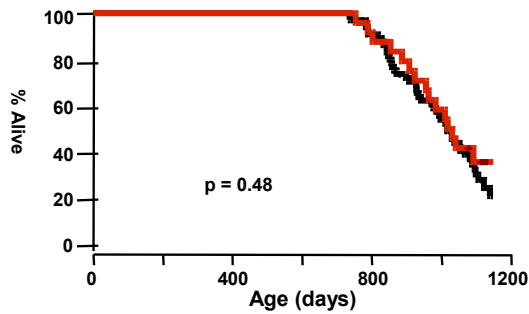

**Figure S2. Lifespan of Female WT and *Igflr*<sup>+/-</sup> Mice on a C57BL/6X129Sv F1 Background.** Male C57Bl/6 *Igflr*<sup>+/-</sup> mice were crossed to female 129 mice to generate female WT and *Igflr*<sup>+/-</sup> mice on a C57BL/6x129Sv F1 background. Of the 66 WT mice, 47 mice died from natural causes, 5 mice were censored, and 14 mice were alive at the time of data analysis. Of 24 *Igflr*<sup>+/-</sup> mice, 16 mice died of natural causes and 8 mice were alive at the time of data analysis. Lifespans of female C57BL/6 x 129Sv F1 hybrids were analyzed using the log-rank test and no significant difference was found (P=0.48). The median survivals were 1009 days (95% confidence interval 963-1079 days) for the WT mice and 1016 days (95% confidence interval 956-1170) for the *Igflr*<sup>+/-</sup> mice.
